# Supplementary material for: Association of Tear Osmolarity With Signs and Symptoms of Dry Eye Disease in the Dry Eye Assessment and Management (DREAM) Study
Source: PubMed Central journal article supplement (PMC9838582; doi:10.1167/iovs.64.1.5), 2023-01-10
Supplement: iovs-64-1-5_s002.pdf [file iovs-64-1-5_s002.pdf]

**Table S1 (Online Supplement):** Association of demographics with osmolarity at baseline, 6 months and 12 months

| Characteristic       |                    | Baseline      |                         |                  | 6 months      |                         |              | 12 months     |                         |             |
|----------------------|--------------------|---------------|-------------------------|------------------|---------------|-------------------------|--------------|---------------|-------------------------|-------------|
|                      |                    | Eyes<br>n=794 | Osmolarity<br>Mean (SE) | P                | Eyes<br>n=676 | Osmolarity<br>Mean (SE) | p            | Eyes<br>n=695 | Osmolarity Mean<br>(SE) | P           |
| Age (years)          | <50                | 186           | 300.7 (1.4)             | 0.21             | 149           | 299.5 (1.4)             | <b>0.04</b>  | 155           | 300.3 (1.4)             | 0.06        |
|                      | 50-59              | 197           | 302.4 (1.5)             |                  | 173           | 305.3 (1.9)             |              | 169           | 303.3 (1.6)             |             |
|                      | 60-69              | 283           | 302.8 (1.1)             |                  | 242           | 303.6 (1.3)             |              | 247           | 302.6 (1.4)             |             |
|                      | ≥70                | 128           | 305.5 (1.8)             |                  | 112           | 304.2 (2.0)             |              | 124           | 307.4 (2.3)             |             |
| Sex                  | Female             | 642           | 302.7 (0.7)             | 0.97             | 551           | 303.6 (0.9)             | 0.32         | 570           | 303.8 (0.9)             | 0.054       |
|                      | Male               | 152           | 302.6 (1.8)             |                  | 125           | 301.5 (2.0)             |              | 125           | 299.7 (1.9)             |             |
| Race                 | White              | 572           | 302.4 (0.8)             | 0.18             | 497           | 302.4 (0.9)             | 0.15         | 516           | 303.2 (1.0)             | 0.21        |
|                      | Black              | 90            | 306.5 (2.4)             |                  | 71            | 303.3 (2.7)             |              | 72            | 306.1 (3.2)             |             |
|                      | Other              | 132           | 301.0 (1.8)             |                  | 108           | 307.1 (2.3)             |              | 107           | 300.8 (1.5)             |             |
| Ethnicity            | Hispanic or Latino | 124           | 299.6 (1.7)             | 0.06             | 92            | 304.7 (2.2)             | 0.47         | 98            | 299.8 (1.3)             | <b>0.01</b> |
|                      | Other              | 670           | 303.2 (0.8)             |                  | 584           | 303.0 (0.9)             |              | 597           | 303.6 (0.9)             |             |
| Cigarette smoking    | Never              | 536           | 302.3 (0.8)             | 0.26             | 457           | 303.5 (1.0)             | 0.86         | 475           | 304.1 (0.9)             | 0.23        |
|                      | Former             | 217           | 302.1 (1.3)             |                  | 194           | 302.8 (1.7)             |              | 194           | 300.8 (1.8)             |             |
|                      | Current            | 41            | 310.8 (5.2)             |                  | 25            | 302.0 (3.2)             |              | 26            | 301.2 (4.6)             |             |
| Diabetes             | No                 | 700           | 302.3 (0.7)             | 0.14             | 597           | 303.0 (0.8)             | 0.51         | 618           | 303.5 (0.9)             | 0.08        |
|                      | Yes                | 94            | 305.7 (2.2)             |                  | 79            | 304.8 (2.6)             |              | 77            | 299.8 (1.9)             |             |
| Hypertension         | No                 | 571           | 302.1 (0.8)             | 0.22             | 490           | 302.9 (0.9)             | 0.56         | 505           | 304.0 (1.0)             | 0.07        |
|                      | Yes                | 223           | 304.2 (1.5)             |                  | 186           | 304.1 (1.7)             |              | 190           | 300.8 (1.5)             |             |
| Sjögren's syndrome   | No                 | 677           | 302.1 (0.7)             | <b>&lt;0.001</b> | 575           | 302.7 (0.9)             | <b>0.008</b> | 599           | 302.5 (0.9)             | 0.0503      |
|                      | Yes                | 74            | 310.8 (2.5)             |                  | 61            | 311.0 (3.0)             |              | 57            | 309.8 (3.6)             |             |
| Thyroid dysfunction  | No                 | 640           | 302.8 (0.8)             | 0.59             | 540           | 303.4 (0.9)             | 0.69         | 555           | 302.9 (0.9)             | 0.56        |
|                      | Yes                | 154           | 301.9 (1.4)             |                  | 136           | 302.6 (1.7)             |              | 140           | 304.1 (2.0)             |             |
| Rheumatoid arthritis | No                 | 718           | 302.6 (0.7)             | 0.95             | 618           | 302.8 (0.8)             | 0.19         | 638           | 303.3 (0.9)             | 0.30        |
|                      | Yes                | 76            | 302.8 (2.3)             |                  | 58            | 307.6 (3.6)             |              | 57            | 300.8 (2.2)             |             |

| Characteristic              |     | Baseline      |                         |      | 6 months      |                         |      | 12 months     |                         |      |
|-----------------------------|-----|---------------|-------------------------|------|---------------|-------------------------|------|---------------|-------------------------|------|
|                             |     | Eyes<br>n=794 | Osmolarity<br>Mean (SE) | P    | Eyes<br>n=676 | Osmolarity<br>Mean (SE) | p    | Eyes<br>n=695 | Osmolarity Mean<br>(SE) | P    |
| Ever worn contact<br>lenses | No  | 493           | 303.2 (0.9)             | 0.35 | 409           | 304.1 (1.1)             | 0.15 | 429           | 303.6 (1.1)             | 0.39 |
|                             | Yes | 301           | 301.8 (1.1)             |      | 267           | 301.9 (1.2)             |      | 266           | 302.2 (1.2)             |      |

**Table S2 (online supplement):** Associations between person-level osmolarity and OSDI

| Osmolarity                                                                    |                |           | Baseline  |            |      | Month 6   |            |      | Month 12  |            |              |
|-------------------------------------------------------------------------------|----------------|-----------|-----------|------------|------|-----------|------------|------|-----------|------------|--------------|
|                                                                               |                |           | # persons | Mean (SE)  | P    | # persons | Mean (SE)  | P    | # persons | Mean (SE)  | P            |
| # of Eyes with osmolarity >308 mOsm/L                                         | As categorical | 0         | 232       | 44.1 (0.9) | 0.84 | 199       | 31.1 (1.2) | 0.59 | 214       | 29.8 (1.2) | <b>0.008</b> |
|                                                                               |                | 1         | 103       | 44.2 (1.4) |      | 76        | 33.6 (2.5) |      | 78        | 30.6 (2.2) |              |
|                                                                               |                | 2         | 54        | 45.4 (2.1) |      | 55        | 33.1 (3.1) |      | 46        | 38.9 (2.7) |              |
|                                                                               | As continuous  | Pearson r | 389       | 0.03       | 0.60 | 330       | 0.05       | 0.40 | 338       | 0.14       | <b>0.008</b> |
| Abnormal osmolarity*                                                          | As categorical | No        | 169       | 43.8 (1.1) | 0.70 | 150       | 32.6 (1.5) | 0.94 | 162       | 31.4 (1.5) | 0.78         |
|                                                                               |                | Yes       | 236       | 44.4 (0.9) |      | 196       | 32.4 (1.4) |      | 195       | 30.8 (1.3) |              |
| Maximum tear osmolarity from two eyes of a patient (mOsm/L) (lower is better) | As categorical | ≤308      | 244       | 43.8 (0.9) | 0.81 | 213       | 31.7 (1.2) | 0.68 | 227       | 29.9 (1.2) | 0.28         |
|                                                                               |                | >308-≤316 | 74        | 45.0 (1.7) |      | 55        | 34.1 (2.9) |      | 49        | 34.5 (3.0) |              |
|                                                                               |                | >316      | 87        | 44.3 (1.6) |      | 78        | 33.3 (2.6) |      | 81        | 32.3 (2.0) |              |
|                                                                               | As continuous  | Pearson r | 405       | 0.02       | 0.64 | 346       | 0.01       | 0.86 | 357       | 0.04       | 0.42         |

\*Abnormal osmolarity defined at the person level as >308 mOsm/L in either eye or an inter-eye difference >8 mOsm/L.

**Table S3 (online supplement):** Associations between changes in person-level osmolarity and changes in OSDI

|                |                                          | Month 6   |                                     |      | Month 12  |                                     |      | All Combined    |                                     |      |
|----------------|------------------------------------------|-----------|-------------------------------------|------|-----------|-------------------------------------|------|-----------------|-------------------------------------|------|
|                | Osmolarity (mOsm/L) change from baseline | # persons | OSDI change from Baseline Mean (SE) | P    | # persons | OSDI change from Baseline Mean (SE) | P    | # person visits | OSDI change from Baseline Mean (SE) | P    |
| As categorical | Decrease >5                              | 118       | -9.5 (1.7)                          | 0.19 | 131       | -13.2 (1.4)                         | 0.99 | 249             | -11.5 (1.3)                         | 0.51 |
|                | Within $\pm$ 5                           | 105       | -13.7 (1.5)                         |      | 91        | -13.3 (1.7)                         |      | 196             | -13.5 (1.3)                         |      |
|                | Increase >5                              | 120       | -12.1 (1.6)                         |      | 129       | -13.0 (1.5)                         |      | 249             | -12.6 (1.3)                         |      |
| As continuous  | Slope (SE)                               | 343       | -0.03 (0.05)                        | 0.62 | 351       | -0.02 (0.04)                        | 0.66 | 694             | -0.02 (0.04)                        | 0.66 |
|                | Pearson r                                | 343       | -0.03                               | .    | 351       | -0.02                               |      | 694             | -0.02                               |      |

**Table S4 (online supplement):** Association between osmolarity with dry eye signs and symptoms at baseline, months 6 and 12

| Month | Osmolarity (mOsm/L) |              | OSDI      |            | Conjunctival staining score |           | Corneal staining score |           | TBUT (seconds)   |           | Schirmer test score |           |            |              |
|-------|---------------------|--------------|-----------|------------|-----------------------------|-----------|------------------------|-----------|------------------|-----------|---------------------|-----------|------------|--------------|
|       |                     | # eyes       | Mean (SE) | P          | Mean (SE)                   | P         | Mean (SE)              | P         | Mean (SE)        | P         | # eyes              | Mean (SE) | P          |              |
| 0     | As categorical      | ≤308         | 579       | 44.0 (0.8) | 0.72                        | 2.9 (0.1) | <b>0.03</b>            | 3.2 (0.1) | <b>&lt;0.001</b> | 3.1 (0.1) | 0.61                | 579       | 10.7 (0.4) | <b>0.02</b>  |
|       |                     | >308 to ≤316 | 101       | 45.3 (1.6) |                             | 3.0 (0.2) |                        | 4.2 (0.3) |                  | 3.0 (0.2) |                     | 101       | 10.2 (0.8) |              |
|       |                     | >316         | 114       | 44.4 (1.7) |                             | 3.3 (0.2) |                        | 4.2 (0.3) |                  | 3.0 (0.2) |                     | 114       | 8.7 (0.6)  |              |
|       | As continuous       | Pearson r    | 794       | 0.01       | 0.79                        | 0.12      | <b>0.002</b>           | 0.15      | <b>0.002</b>     | -0.05     | 0.15                | 794       | -0.10      | <b>0.003</b> |
| 6     | As categorical      | ≤308         | 488       | 31.8 (1.1) | 0.72                        | 2.5 (0.1) | <b>&lt;0.001</b>       | 2.7 (0.1) | <b>0.02</b>      | 3.7 (0.2) | <b>0.02</b>         | 483       | 11.0 (0.4) | <b>0.01</b>  |
|       |                     | >308 to ≤316 | 93        | 33.3 (2.5) |                             | 2.7 (0.2) |                        | 3.2 (0.3) |                  | 3.4 (0.3) |                     | 91        | 10.3 (0.8) |              |
|       |                     | >316         | 95        | 33.7 (2.9) |                             | 3.3 (0.2) |                        | 3.9 (0.4) |                  | 3.0 (0.2) |                     | 94        | 8.6 (0.8)  |              |
|       | As continuous       | Pearson r    | 676       | 0.02       | 0.76                        | 0.23      | <b>&lt;0.001</b>       | 0.20      | <b>&lt;0.001</b> | -0.09     | <b>0.04</b>         | 668       | -0.13      | <b>0.002</b> |
| 12    | As categorical      | ≤308         | 519       | 30.0 (1.1) | <b>0.04</b>                 | 2.4 (0.1) | <b>0.002</b>           | 2.7 (0.2) | <b>0.004</b>     | 3.6 (0.1) | 0.18                | 514       | 10.8 (0.4) | 0.32         |
|       |                     | >308 to ≤316 | 69        | 36.3 (2.8) |                             | 2.3 (0.2) |                        | 2.6 (0.3) |                  | 4.0 (0.3) |                     | 68        | 10.4 (0.8) |              |
|       |                     | >316         | 107       | 33.6 (2.1) |                             | 3.1 (0.2) |                        | 4.0 (0.4) |                  | 3.3 (0.2) |                     | 107       | 9.5 (0.8)  |              |
|       | As continuous       | Pearson r    | 695       | 0.07       | 0.16                        | 0.19      | <b>&lt;0.001</b>       | 0.18      | <b>&lt;0.001</b> | -0.03     | 0.35                | 689       | 0.01       | 0.90         |

**Table S5 (online supplement):** Association between change in osmolarity with change in dry eye signs and symptoms for months 6 and 12 separately and combined.

| Month | Change of osmolarity (mOsm/L) from baseline |             | # eyes | Change of OSDI from baseline |      | Change of conjunctival staining score from baseline |      | Change of corneal staining score from baseline |      | Change of TBUT (seconds) from baseline |       | Change of Schirmer test score from baseline |              |      |
|-------|---------------------------------------------|-------------|--------|------------------------------|------|-----------------------------------------------------|------|------------------------------------------------|------|----------------------------------------|-------|---------------------------------------------|--------------|------|
|       |                                             |             |        | Mean (SE)                    | P    | Mean (SE)                                           | P    | Mean (SE)                                      | P    | Mean (SE)                              | P     | # eyes                                      | Mean (SE)    | P    |
| All   | As categorical                              | Decrease >5 | 442    | -11.5 (1.2)                  | 0.33 | -0.40 (0.07)                                        | 0.79 | -0.53 (0.14)                                   | 0.52 | 0.32 (0.17)                            | 0.45  | 440                                         | 0.37 (0.36)  | 0.42 |
|       |                                             | Within ±5   | 396    | -13.3 (1.0)                  |      | -0.34 (0.08)                                        |      | -0.51 (0.12)                                   |      | 0.55 (0.14)                            |       | 391                                         | -0.26 (0.43) |      |
|       |                                             | Increase >5 | 489    | -12.5 (1.2)                  |      | -0.38 (0.07)                                        |      | -0.67 (0.11)                                   |      | 0.55 (0.11)                            |       | 484                                         | 0.13 (0.40)  |      |
|       | As continuous                               | Pearson r   | 1327   | -0.03                        | 0.43 | 0.04                                                | 0.23 | 0.02                                           | 0.51 | 0.04                                   | 0.09  | 1315                                        | -0.03        | 0.40 |
| 6     | As categorical                              | Decrease >5 | 216    | -9.8 (1.5)                   | 0.17 | -0.30 (0.09)                                        | 0.99 | -0.41 (0.18)                                   | 0.46 | 0.47 (0.21)                            | 0.75  | 214                                         | 0.72 (0.47)  | 0.33 |
|       |                                             | Within ±5   | 207    | -12.9 (1.2)                  |      | -0.29 (0.10)                                        |      | -0.63 (0.15)                                   |      | 0.58 (0.22)                            |       | 205                                         | -0.07 (0.53) |      |
|       |                                             | Increase >5 | 235    | -12.7 (1.4)                  |      | -0.28 (0.09)                                        |      | -0.67 (0.15)                                   |      | 0.40 (0.13)                            |       | 232                                         | -0.16 (0.47) |      |
|       | As continuous                               | Pearson r   | 658    | -0.05                        | 0.32 | 0.01                                                | 0.76 | -0.02                                          | 0.58 | -0.02                                  | 0.51  | 651                                         | -0.06        | 0.12 |
| 12    | As categorical                              | Decrease >5 | 226    | -13.1 (1.3)                  | 0.69 | -0.50 (0.10)                                        | 0.73 | -0.65 (0.16)                                   | 0.31 | 0.18 (0.18)                            | 0.07  | 226                                         | 0.03 (0.48)  | 0.48 |
|       |                                             | Within ±5   | 189    | -13.7 (1.3)                  |      | -0.39 (0.11)                                        |      | -0.37 (0.17)                                   |      | 0.53 (0.16)                            |       | 186                                         | -0.46 (0.60) |      |
|       |                                             | Increase >5 | 254    | -12.3 (1.3)                  |      | -0.46 (0.08)                                        |      | -0.67 (0.15)                                   |      | 0.68 (0.13)                            |       | 252                                         | 0.40 (0.50)  |      |
|       | As continuous                               | Pearson r   | 669    | -0.01                        | 0.80 | 0.06                                                | 0.14 | 0.07                                           | 0.23 | 0.10                                   | 0.002 | 664                                         | 0.01         | 0.85 |

**Table S6 (online supplement):** Association between osmolarity with keratography measures for baseline, months 6 and 12 combined and separately

|                                    | Osmolarity (mOsm/L) |           | Keratograph break-up time |           |                  | Bulbar redness score |             |              | Tear meniscus height |             |      |
|------------------------------------|---------------------|-----------|---------------------------|-----------|------------------|----------------------|-------------|--------------|----------------------|-------------|------|
| Month                              |                     |           | # eyes                    | Mean (SE) | P                | # eyes               | Mean (SE)   | P            | # eyes               | Mean (SE)   | P    |
| Baseline, 6 and 12 months combined | As categorical      | ≤308      | 1092                      | 8.4 (0.3) | <b>0.01</b>      | 1129                 | 0.39 (0.01) | 0.13         | 1064                 | 1.16 (0.03) | 0.89 |
|                                    |                     | >308-≤316 | 161                       | 7.3 (0.4) |                  | 167                  | 0.36 (0.01) |              | 148                  | 1.14 (0.05) |      |
|                                    |                     | >316      | 164                       | 7.1 (0.4) |                  | 172                  | 0.37 (0.03) |              | 157                  | 1.16 (0.06) |      |
|                                    | As continuous       | Pearson r | 1417                      | -0.12     | <b>&lt;0.001</b> | 1468                 | -0.09       | <b>0.049</b> | 1369                 | 0.00        | 0.93 |
| Baseline                           | As categorical      | ≤308      | 394                       | 8.7 (0.4) | <b>0.007</b>     | 398                  | 0.39 (0.01) | 0.37         | 373                  | 1.15 (0.03) | 0.75 |
|                                    |                     | >308-≤316 | 77                        | 6.8 (0.5) |                  | 78                   | 0.36 (0.02) |              | 69                   | 1.17 (0.06) |      |
|                                    |                     | >316      | 62                        | 7.8 (0.7) |                  | 63                   | 0.37 (0.03) |              | 56                   | 1.10 (0.07) |      |
|                                    | As continuous       | Pearson r | 533                       | -0.12     | <b>0.006</b>     | 539                  | -0.09       | 0.07         | 498                  | -0.02       | 0.63 |
| 6 Months                           | As categorical      | ≤308      | 341                       | 8.2 (0.3) | 0.20             | 347                  | 0.39 (0.01) | 0.07         | 327                  | 1.17 (0.04) | 0.97 |
|                                    |                     | >308-≤316 | 51                        | 7.2 (0.8) |                  | 52                   | 0.34 (0.02) |              | 45                   | 1.15 (0.07) |      |
|                                    |                     | >316      | 53                        | 7.0 (0.7) |                  | 55                   | 0.38 (0.03) |              | 47                   | 1.16 (0.10) |      |
|                                    | As continuous       | Pearson r | 445                       | -0.13     | <b>0.01</b>      | 454                  | -0.09       | 0.19         | 419                  | 0.03        | 0.64 |
| 12 Months                          | As categorical      | ≤308      | 357                       | 8.1 (0.4) | <b>0.02</b>      | 384                  | 0.39 (0.01) | 0.84         | 364                  | 1.17 (0.03) | 0.43 |
|                                    |                     | >308-≤316 | 33                        | 8.8 (0.9) |                  | 37                   | 0.38 (0.04) |              | 34                   | 1.08 (0.08) |      |
|                                    |                     | >316      | 49                        | 6.2 (0.6) |                  | 54                   | 0.37 (0.04) |              | 54                   | 1.21 (0.08) |      |
|                                    | As continuous       | Pearson r | 439                       | -0.12     | <b>0.02</b>      | 475                  | -0.10       | 0.10         | 452                  | 0.01        | 0.92 |

**Table S7 (online supplement):** Association between change of osmolarity with change of keratography measures for 6 months and 12 months combined and separately

| Month                    | Change of osmolarity (mOsm/L) from baseline |             | Change of keratograph break-up time from baseline |              |      | Change of bulbar redness score from baseline |                |      | Change of tear meniscus height from baseline |                |      |
|--------------------------|---------------------------------------------|-------------|---------------------------------------------------|--------------|------|----------------------------------------------|----------------|------|----------------------------------------------|----------------|------|
|                          |                                             |             | # eyes                                            | Mean (SE)    | P    | # eyes                                       | Mean (SE)      | P    | # eyes                                       | Mean (SE)      | P    |
| 6 and 12 months combined | As categorical                              | Decrease >5 | 290                                               | -0.20 (0.45) | 0.59 | 312                                          | -0.002 (0.011) | 0.68 | 266                                          | -0.010 (0.027) | 0.96 |
|                          |                                             | Within ±5   | 269                                               | -0.56 (0.43) |      | 283                                          | -0.001 (0.010) |      | 255                                          | -0.001 (0.024) |      |
|                          |                                             | Increase >5 | 277                                               | -0.87 (0.50) |      | 293                                          | -0.010 (0.010) |      | 263                                          | -0.001 (0.038) |      |
|                          | As continuous                               | Pearson r   | 836                                               | -0.02        | 0.56 | 888                                          | -0.06          | 0.09 | 784                                          | -0.03          | 0.62 |
| 6 months                 | As categorical                              | Decrease >5 | 148                                               | -0.34 (0.60) | 0.89 | 152                                          | -0.008 (0.011) | 1.00 | 130                                          | -0.002 (0.035) | 1.00 |
|                          |                                             | Within ±5   | 146                                               | -0.71 (0.54) |      | 149                                          | -0.009 (0.011) |      | 132                                          | -0.002 (0.034) |      |
|                          |                                             | Increase >5 | 132                                               | -0.63 (0.64) |      | 139                                          | -0.009 (0.011) |      | 118                                          | 0.001 (0.054)  |      |
|                          | As continuous                               | Pearson r   | 426                                               | -0.01        | 0.86 | 440                                          | -0.04          | 0.36 | 380                                          | 0.04           | 0.56 |
| 12 months                | As categorical                              | Decrease >5 | 142                                               | -0.05 (0.51) | 0.41 | 160                                          | 0.004 (0.015)  | 0.45 | 136                                          | -0.018 (0.036) | 0.93 |
|                          |                                             | Within ±5   | 123                                               | -0.38 (0.59) |      | 134                                          | 0.009 (0.013)  |      | 123                                          | 0.000 (0.034)  |      |
|                          |                                             | Increase >5 | 145                                               | -1.09 (0.62) |      | 154                                          | -0.011 (0.013) |      | 145                                          | -0.002 (0.038) |      |
|                          | As continuous                               | Pearson r   | 410                                               | -0.04        | 0.47 | 448                                          | -0.07          | 0.11 | 404                                          | -0.09          | 0.18 |
